# Supplementary material for: Conditional Analysis for Mixed Covariates, with Application to Feed Intake of Lactating Sows
Source: Hindawi journal article supplement (doi:10.1155/2019/3743762), 2019-07-16
Supplement: f1 [file 3743762.f1.zip]

Archive with 3 entries (2 files):
- New folder/
- New folder/quantile_paper_supp_JPS_2781616.tex
- New folder/quantile_paper_supp_JPS_2781617.pdf
